# Supplementary material
Source: Springer Nature journal article supplement (https://www.springermedizin.de/resource/supplementary/12936_2013_2791_MOESM2_ESM.pdf/9544246)
Supplement: MOESM2 [file 9544246]

Additional file 2 Age distribution and gender of participants from three sub villages in Nangapanda, Ende district

| <b>Age Group</b> | <b>Total</b><br>n total (% male) | <b>Sub Villages n total (% male)</b> |                    |                    |
|------------------|----------------------------------|--------------------------------------|--------------------|--------------------|
|                  |                                  | Ndeturea                             | Ndorurea 1         | Ndorurea           |
| 4-9              | 278 (52.52)                      | 66 (59.10)                           | 88 (54.55)         | 124 (47.58)        |
| 10-14            | 214 (50.00)                      | 36 (58.33)                           | 78 (43.59)         | 100 (52.00)        |
| 15-19            | 150 (42.00)                      | 22 (22.73)                           | 64 (51.56)         | 64 (39.06)         |
| 20-29            | 158 (22.15)                      | 39 (12.82)                           | 57 (28.07)         | 62 (22.58)         |
| 30-39            | 192 (27.60)                      | 45 (22.22)                           | 71 (26.76)         | 76 (31.58)         |
| 40-49            | 255 (41.96)                      | 48 (33.33)                           | 89 (44.94)         | 118 (43.22)        |
| 50<              | 262 (45.04)                      | 64 (40.63)                           | 87 (48.28)         | 111 (45.05)        |
| <b>Total</b>     | <b>1509 (41.68)</b>              | <b>320 (38.13)</b>                   | <b>534 (43.45)</b> | <b>655 (41.98)</b> |
